# Supplementary material for: Crystal structures, bonding and electronic structures of α- and β-Ir2B3−x compounds
Source: Royal Society of Chemistry journal article supplement (doi:10.1039/d4dt02095b), 2024-01-01
Supplement: d4dt02095b1.pdf [file d4dt02095b1.pdf]

## SUPPLEMENTARY MATERIAL

### **Crystal structure, bonding and electronic structure of $\alpha$ - and $\beta$ -Ir<sub>2</sub>B<sub>3-x</sub> compounds**

Oksana Sologub<sup>1,\*</sup>, Leonid P. Salamakha<sup>1,5</sup>, Berthold Stöger<sup>2</sup>, Takao Mori<sup>3</sup>,

Neven Barisic<sup>1,6</sup>, Peter F. Rogl<sup>4</sup>, Herwig Michor<sup>1</sup>, Ernst Bauer<sup>1</sup>

<sup>1</sup>Institute of Solid State Physics, TU Wien, A-1040 Vienna, Austria

<sup>2</sup>X-Ray Centre, TU Wien, A-1060 Vienna, Austria

<sup>3</sup>National Institute for Materials Science (NIMS), Research Center for Materials

Nanoarchitectonics (MANA), Tsukuba, Japan

<sup>4</sup>Institute of Materials Chemistry, University of Vienna,

A-1090 Vienna, Austria

<sup>5</sup>Department of Physics of Metals, Faculty of Physics, I. Franko L'viv National University,

79005, L'viv, Ukraine

<sup>6</sup>Department of Physics, Faculty of Science, University of Zagreb, Croatia

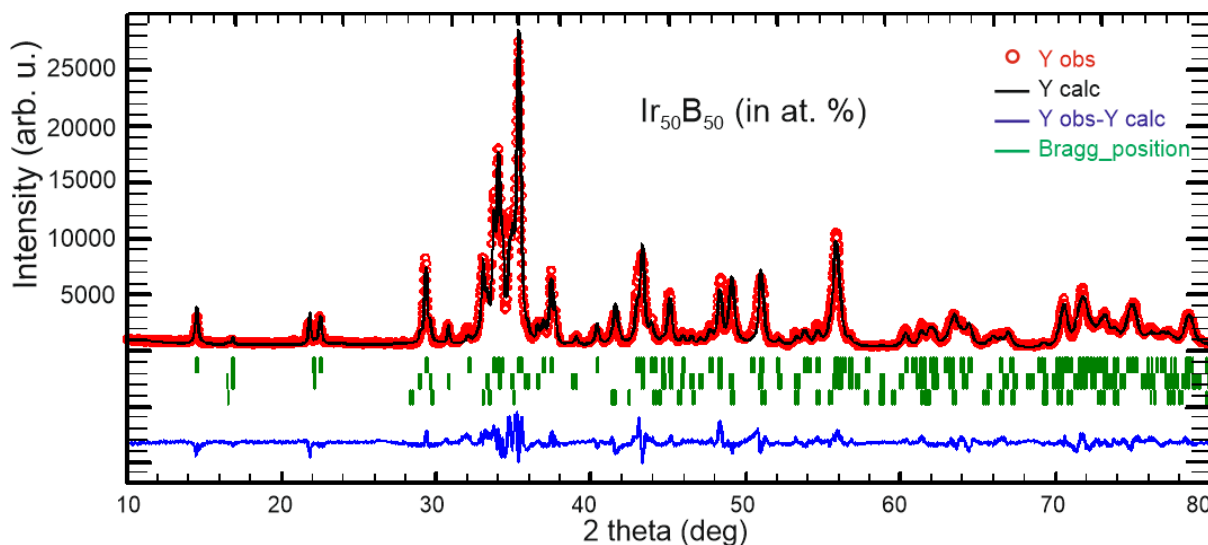

**Figure S1.** Powder X-ray diffraction pattern of  $\sim\text{Ir}_{50}\text{B}_{50}$  (in at. %) sample obtained from high-temperature synthesis. Upper row of  $hkl$  labels corresponds to  $\alpha\text{-Ir}_3\text{B}_{2-x}$  (space group  $C2/m$ ;  $a=10.5433(8)$  Å,  $b=2.8924(3)$  Å,  $c=6.0927(6)$  Å,  $\beta=91.052(6)^\circ$ ), middle row represents the  $\beta\text{-Ir}_3\text{B}_{2-x}$  (space group  $Pnma$ ;  $a=10.766(1)$  Å,  $b=2.8422(5)$  Å,  $c=6.0367(9)$  Å), lower row stands for the phase  $\text{Ir}_5\text{B}_4$  (space group  $I4_1/a$ ,  $a=6.2912(6)$  Å,  $c=10.256(1)$  Å). For Rietveld refinement, the structure models of  $\alpha\text{-Ir}_2\text{B}_{3-x}$  (single crystal X-ray diffraction data; current work),  $\text{Ir}_3\text{B}_{2-x}$  [20] and  $\beta\text{-Ir}_2\text{B}_{3-x}$  (denoted as  $\text{Ir}_5\text{B}_4$  in [23]) were applied. Crystal structure data of  $\beta\text{-Ir}_3\text{B}_{2-x}$  as obtained from Rietveld refinement of powder pattern of HTS sample: space group  $Pnma$ ;  $a=10.766(1)$  Å,  $b=2.8422(5)$  Å,  $c=6.0367(9)$  Å; Ir1 in  $4c$ ,  $x=0.8539(8)$ ,  $y=1/4$ ,  $z=0.352(1)$ , Ir2 in  $4c$ ,  $x=0.5981(8)$ ,  $y=1/4$ ,  $z=0.274(1)$ , B1 in  $4c$ ,  $x=0.5713$ ,  $y=3/4$ ,  $z=0.5280$ ; B2 in  $4c$ ,  $x=0.8010$ ,  $y=3/4$ ,  $z=0.0970$ ; B3 in  $4c$ ,  $x=0.0080$ ,  $y=1/4$ ,  $z=0.5570$ . Atom coordinates of boron atoms were fixed during refinement.

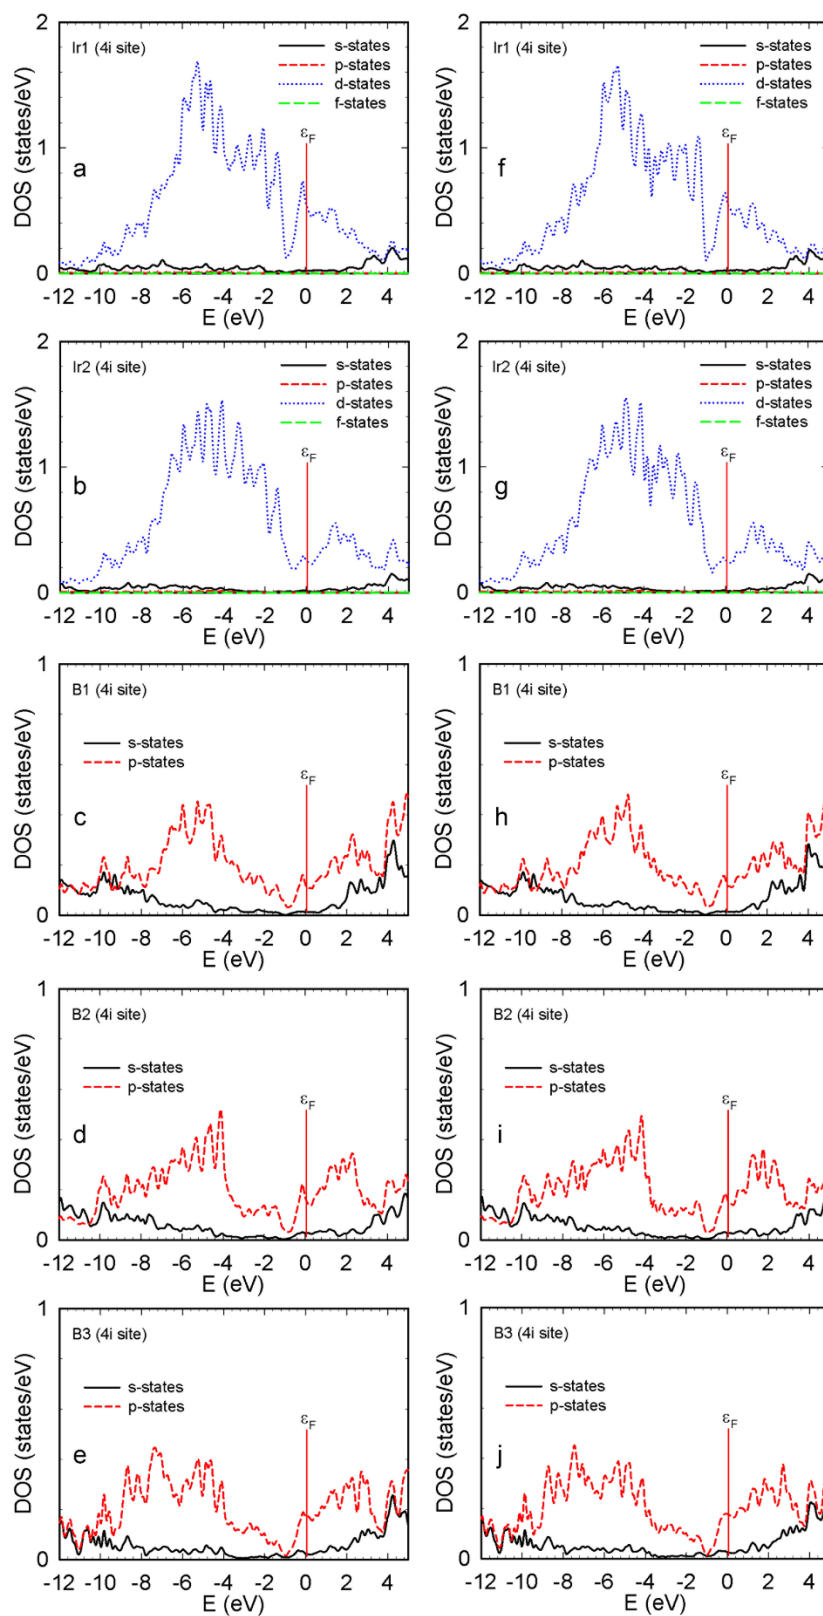

**Figure S2.** Distribution of partial (per one atom) density of states in  $\alpha$ - $\text{Ir}_2\text{B}_{3-x}$  without (a, b, c, d, e) and with (f, g, h, i, j) SOC.

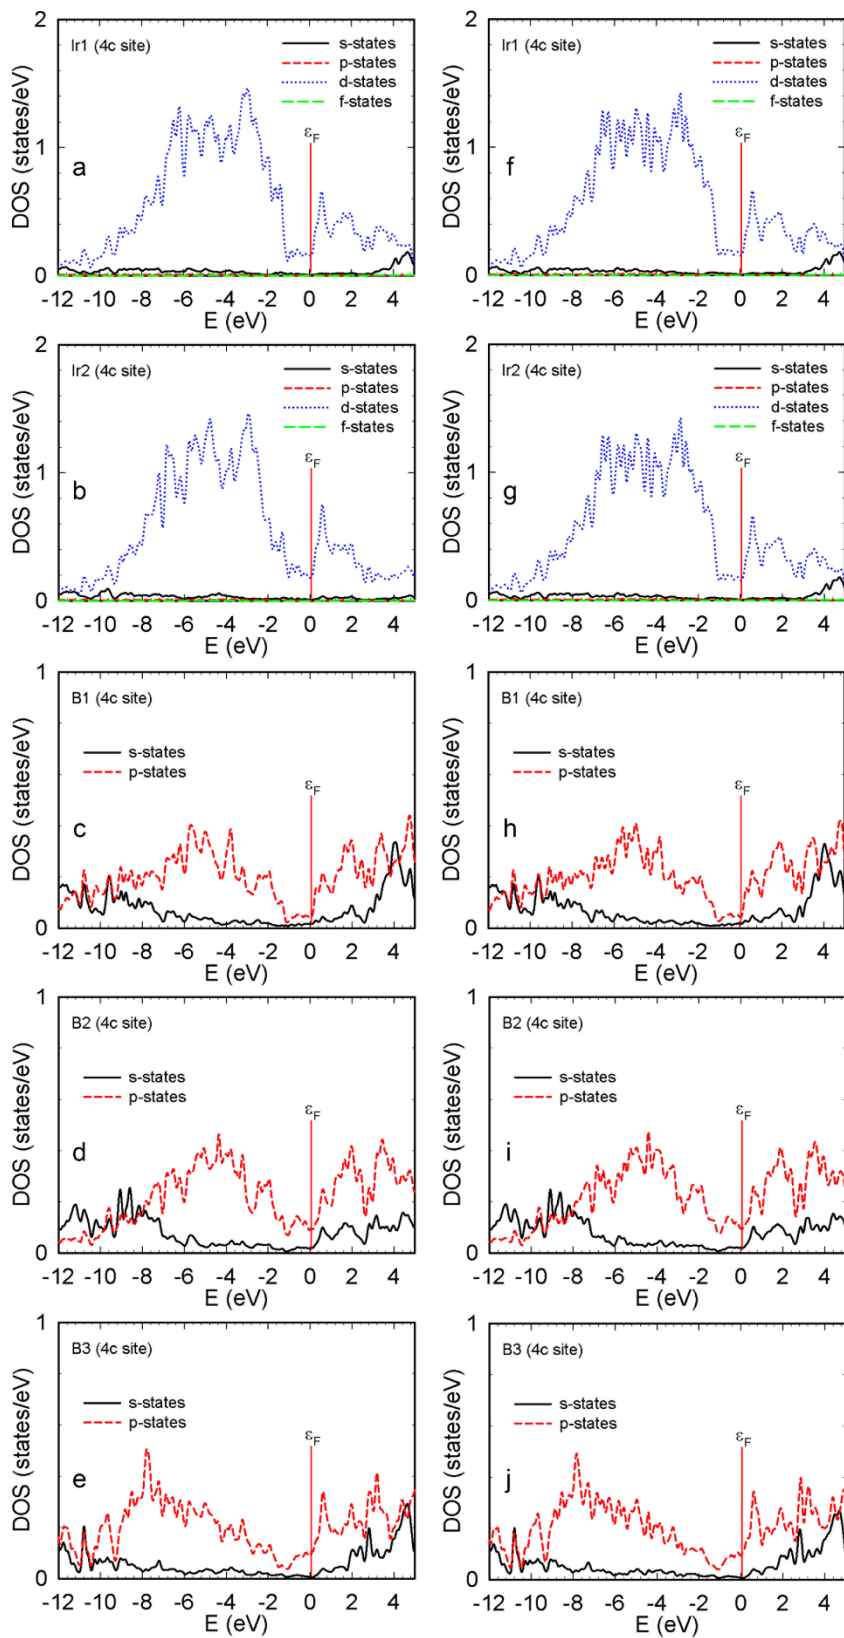

**Figure S3.** Distribution of the partial (per one atom) density of states in  $\beta$ - $\text{Ir}_2\text{B}_{3-x}$  without (a, b, c, d, e) and with (f, g, h, i, j) SOC.

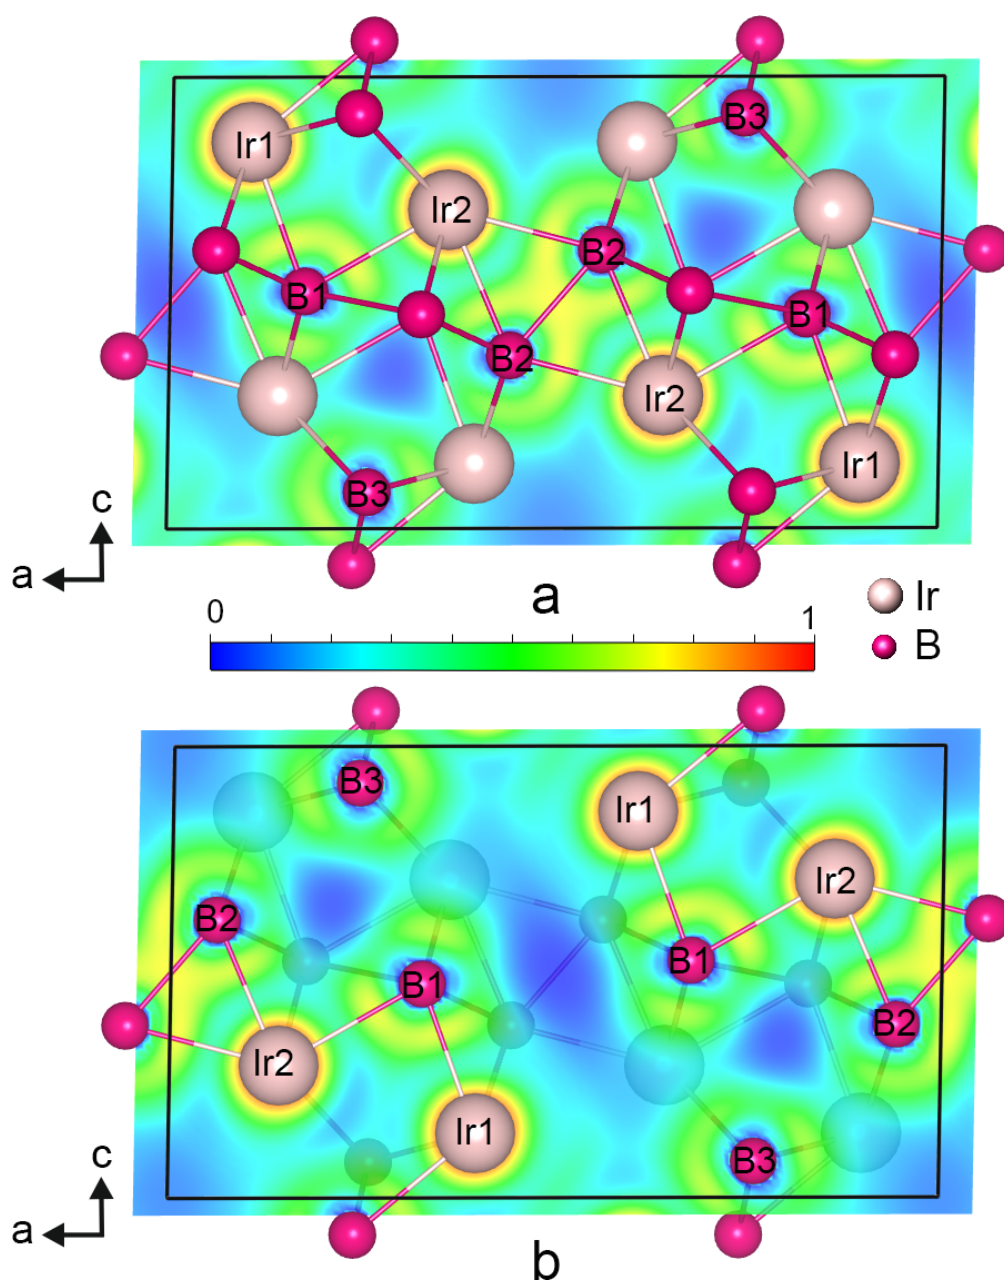

**Figure S4.** Sections of calculated electron localization function in  $\alpha$ - $\text{Ir}_2\text{B}_{3-x}$  structure within the (010) (a) and (020) (b) planes. Some atoms are located above (a) and below (b) the planes.

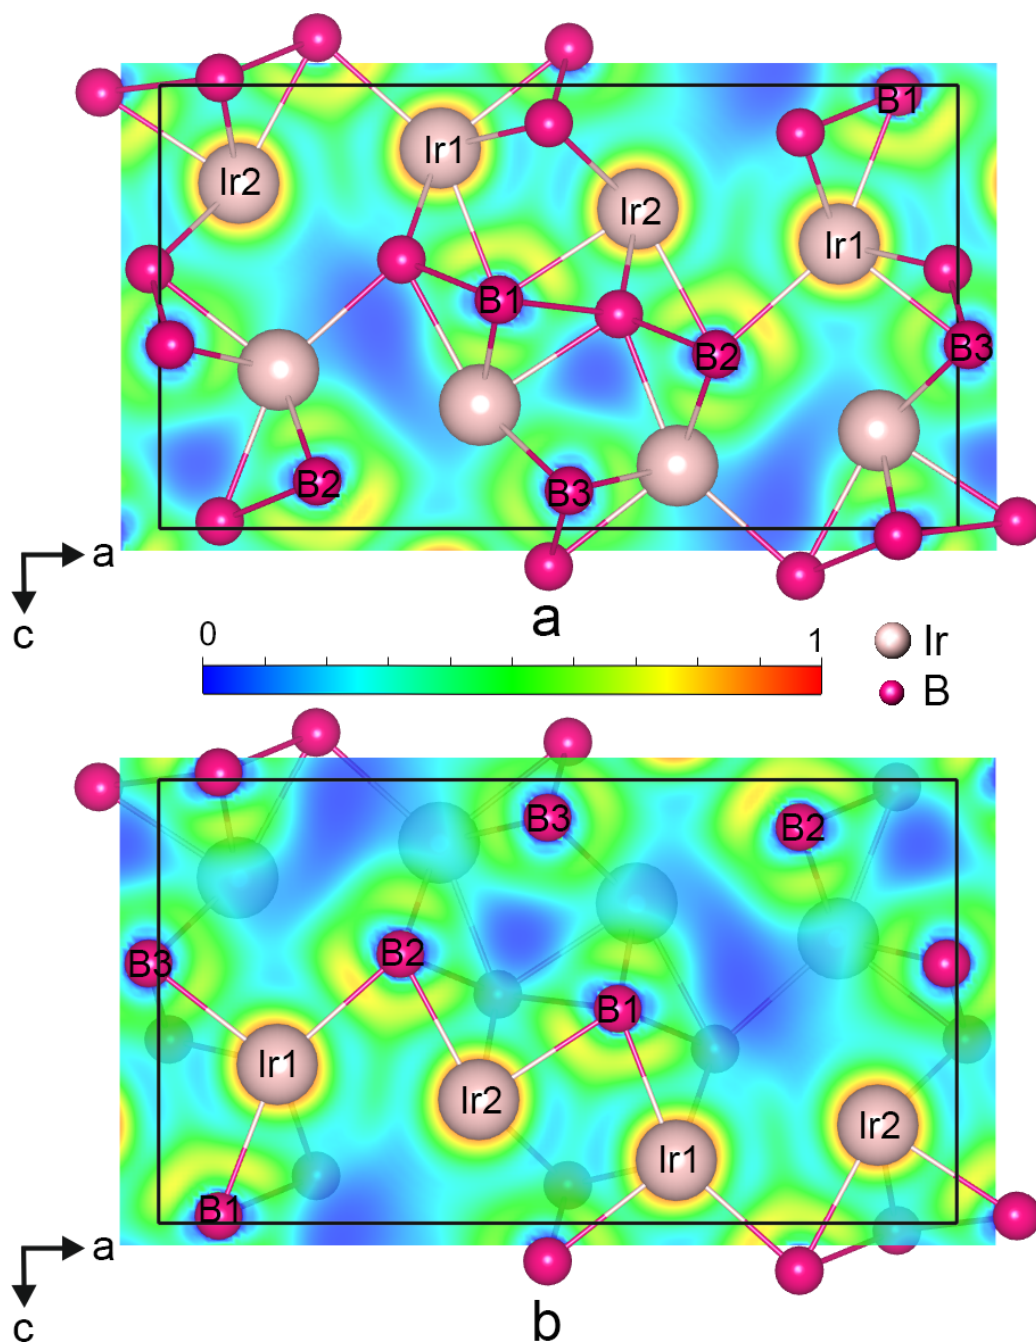

**Figure S5.** Sections of calculated electron localization function in  $\beta$ - $\text{Ir}_2\text{B}_{3-x}$  structure within the (040) (a) and (080) (b) planes. Some atoms are located above (a) and below (b) the planes.

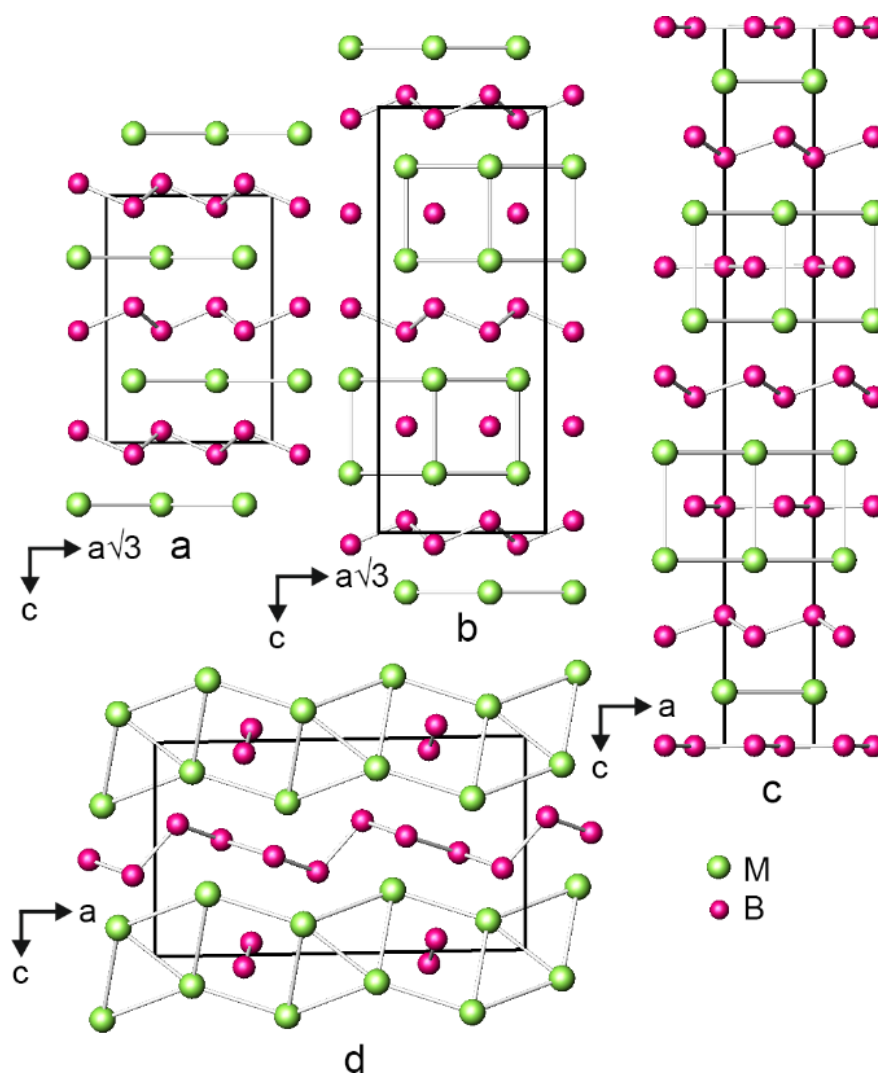

**Figure S6.** Crystal structures of  $\text{ReB}_2$  (a),  $\text{Ru}_2\text{B}_3$  (b),  $\text{Mo}_2\text{B}_4$  (c) and  $\alpha\text{-Ir}_2\text{B}_{3-x}$  (d).
